# Supplementary material for: Hepatic fat is a stronger correlate of key clinical and molecular abnormalities than visceral and abdominal subcutaneous fat in youth
Source: PubMed Central journal article supplement — BMJ Open Diabetes Res Care. 2020 Jul 22;8(1):e001126. doi: 10.1136/bmjdrc-2019-001126 (PMC7380953; doi:10.1136/bmjdrc-2019-001126), 2020-07-22
Supplement: bmjdrc-2019-001126supp001.pdf [file bmjdrc-2019-001126supp001.pdf]

**ONLINE SUPPLEMENTARY FIGURES**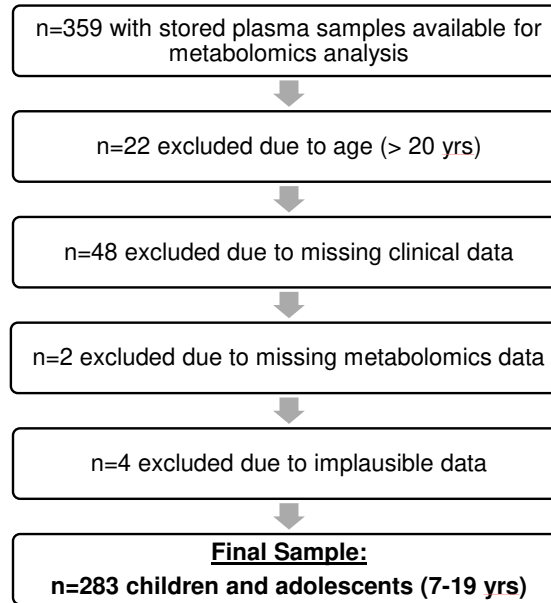

**Figure S1:** Flow chart of inclusion/exclusion criteria for selecting the final analytical sample of 283 children and adolescents (7-19 yrs) in the Yale NAFLD Pediatric Cohort
